# Supplementary material for: Haploinsufficiency predictions without study bias
Source: PubMed Central journal article supplement (PMC4551909; doi:10.1093/nar/gkv474), 2015-05-22
Supplement: supp_gkv474_nar-03716-met-n-2014-File005.pdf [file supp_gkv474_nar-03716-met-n-2014-File005.pdf]

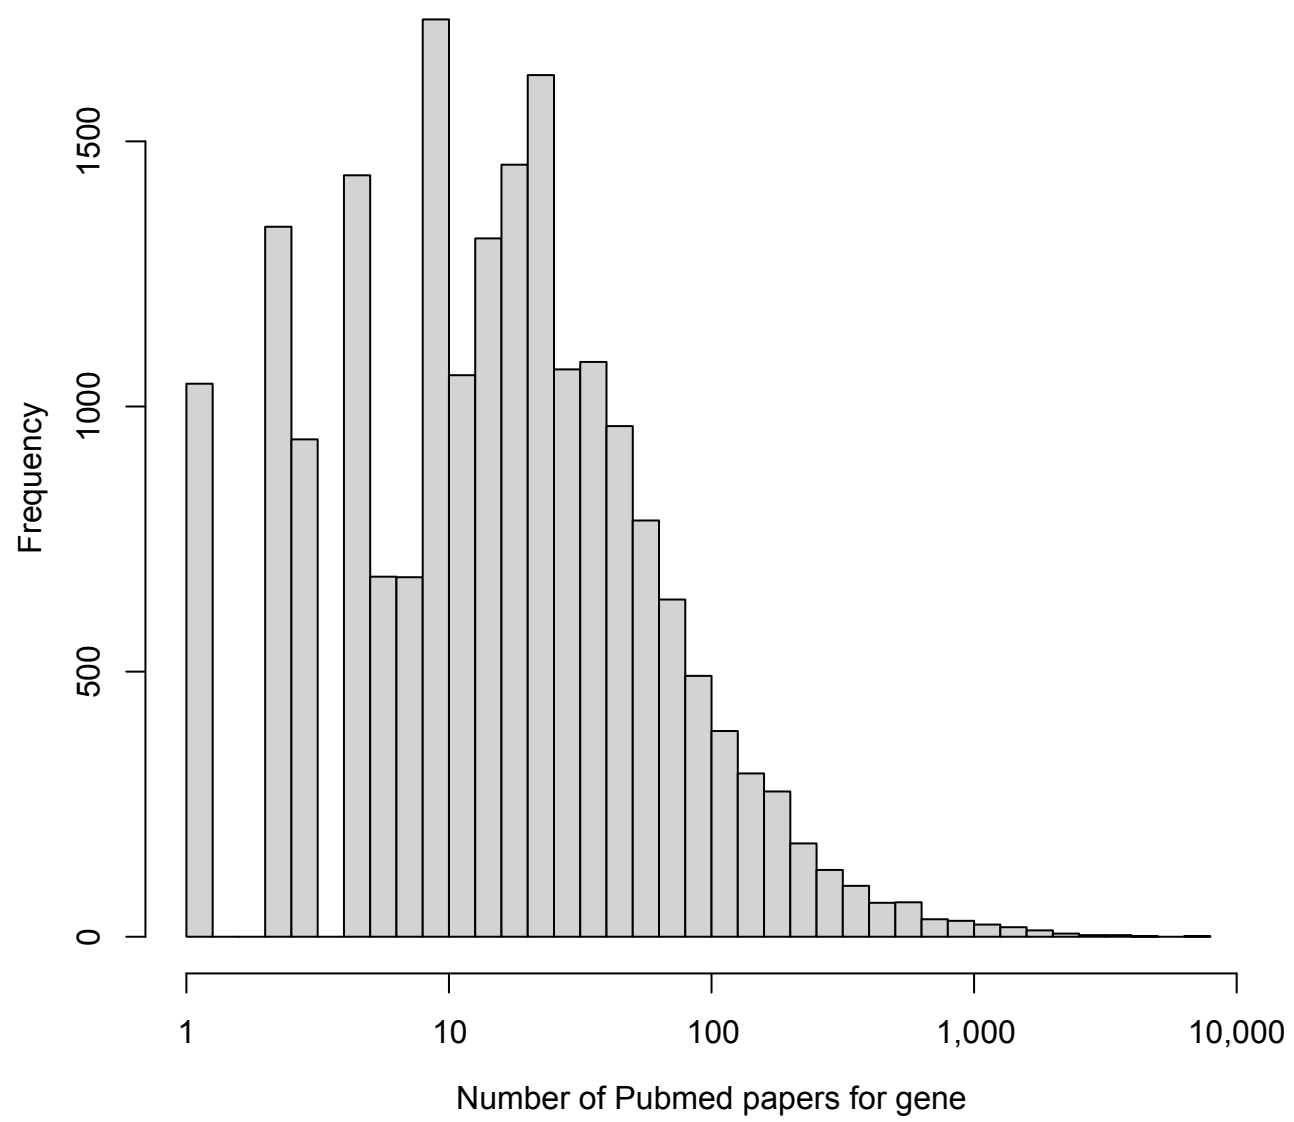

Figure S1

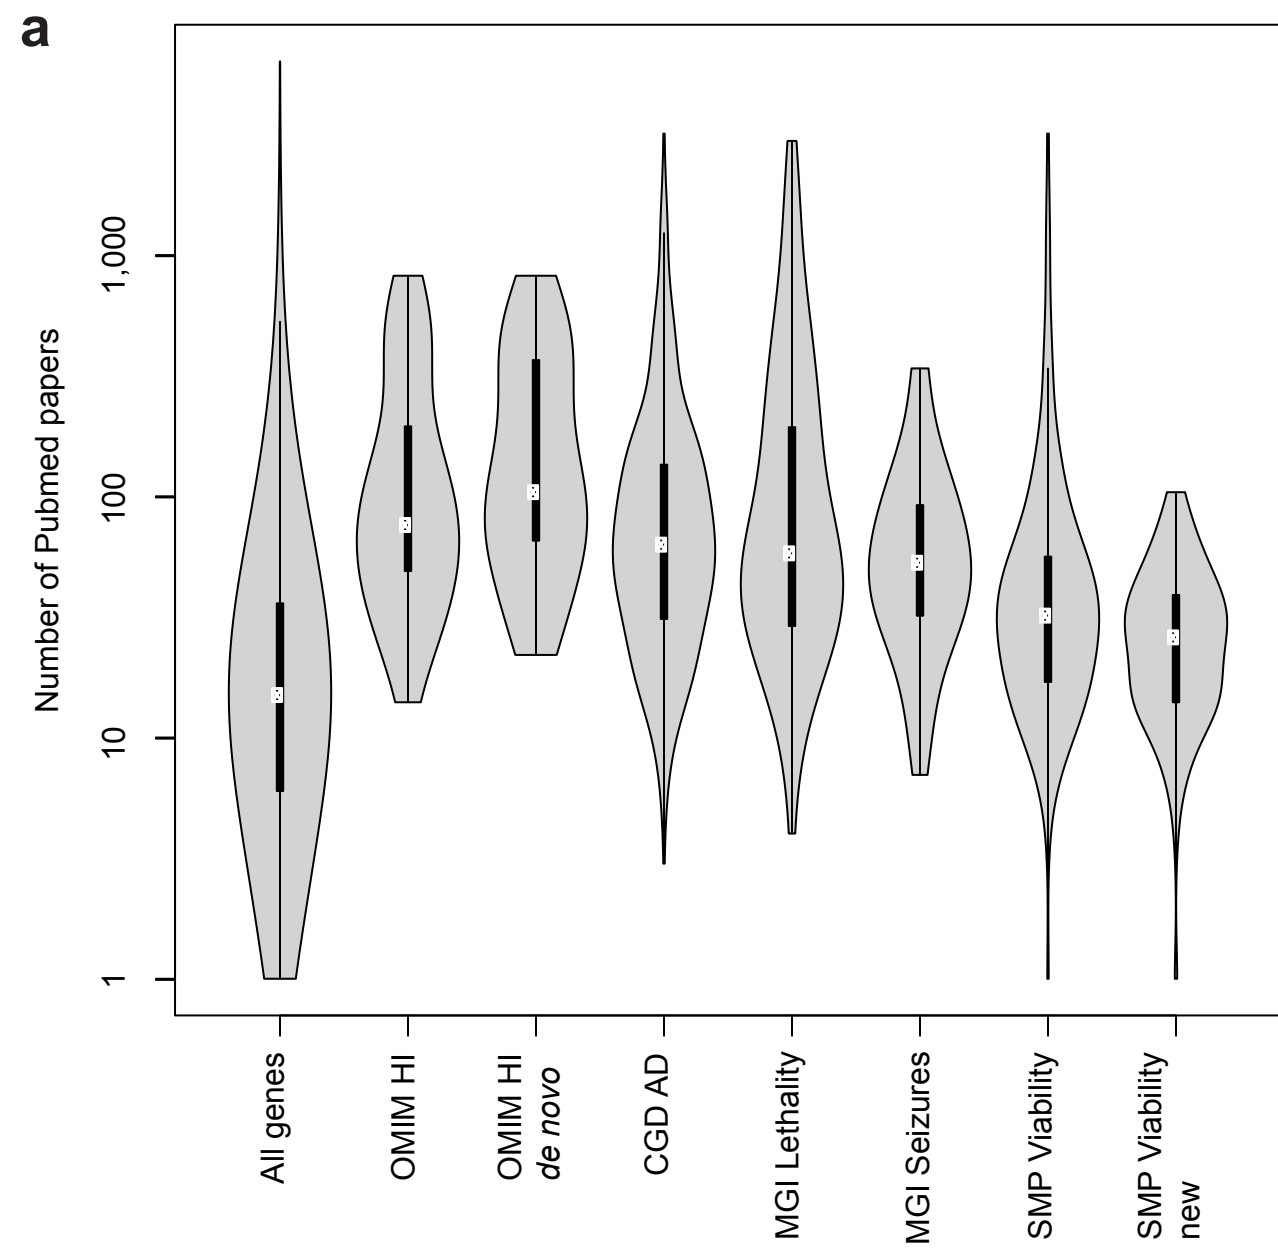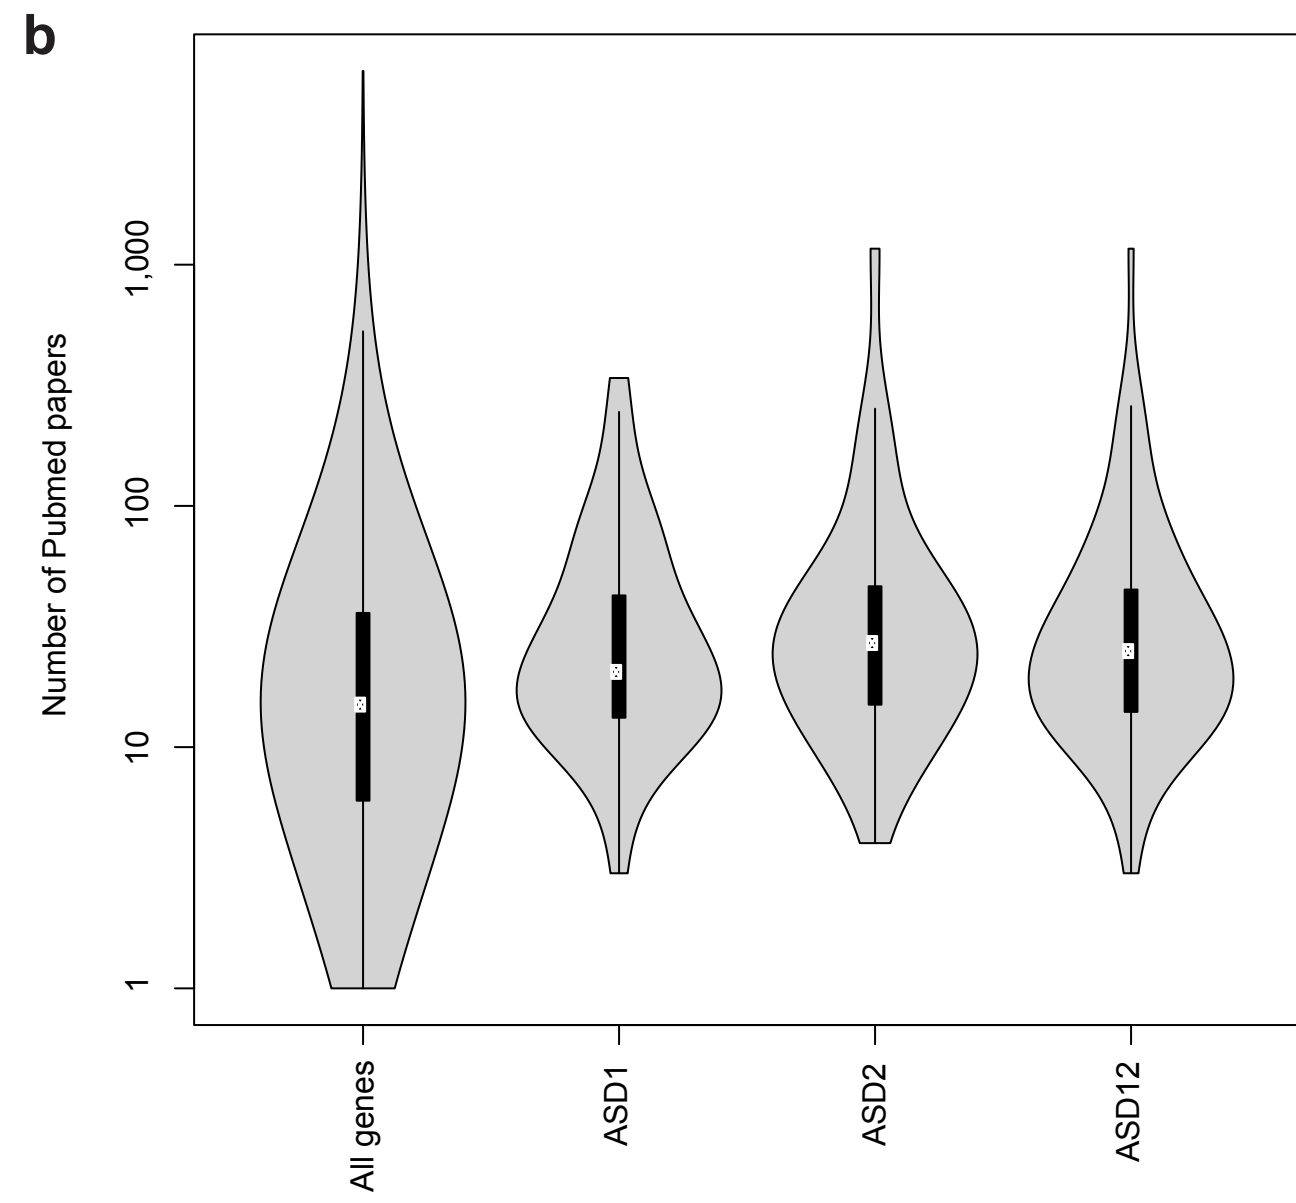

Figure S2

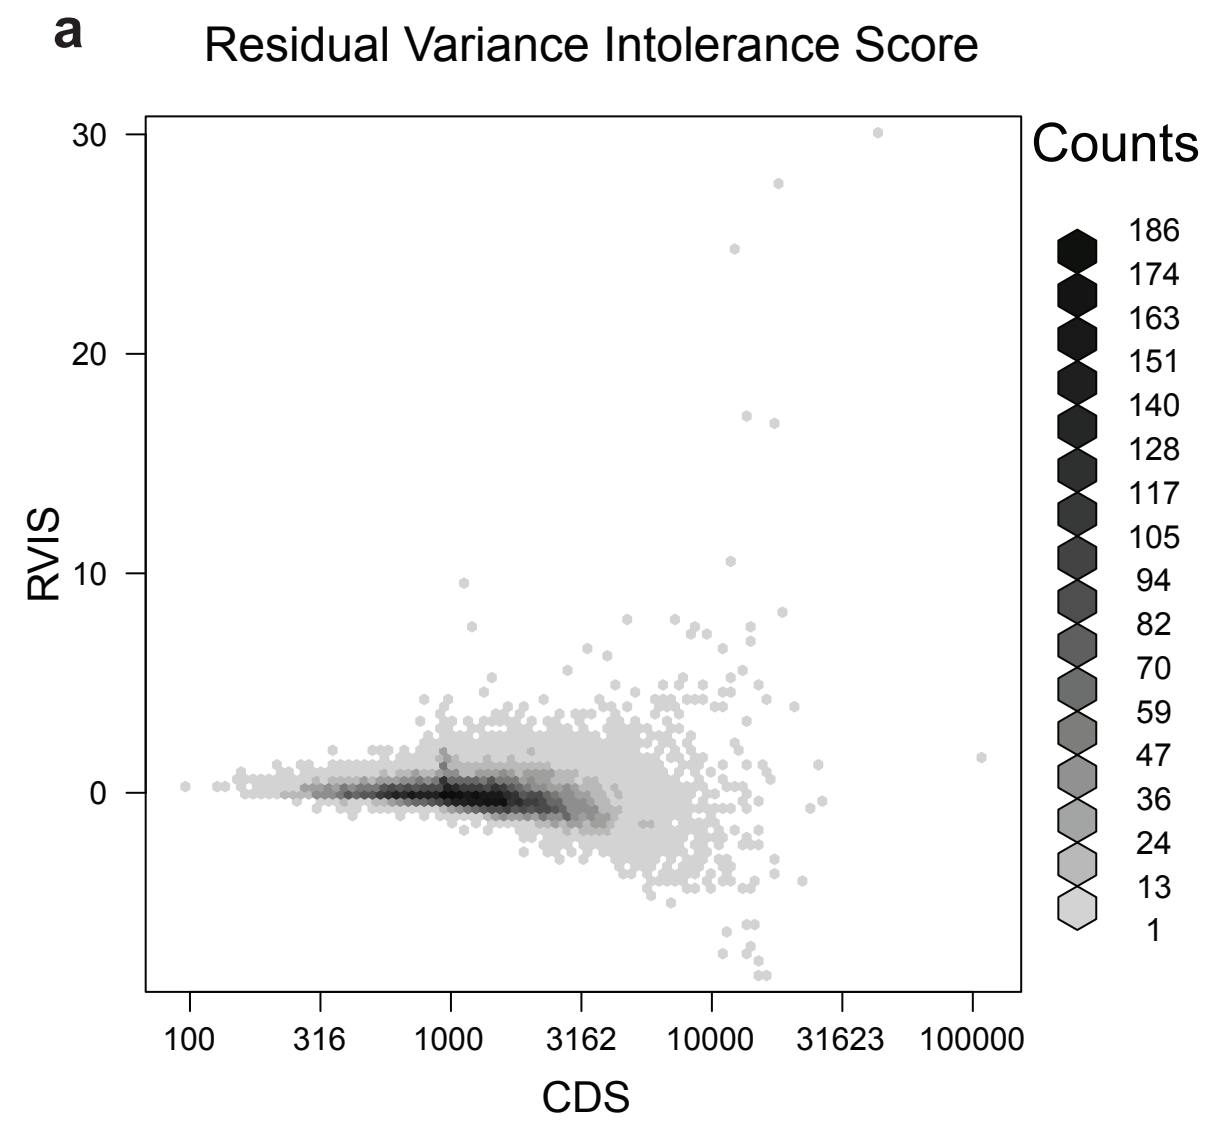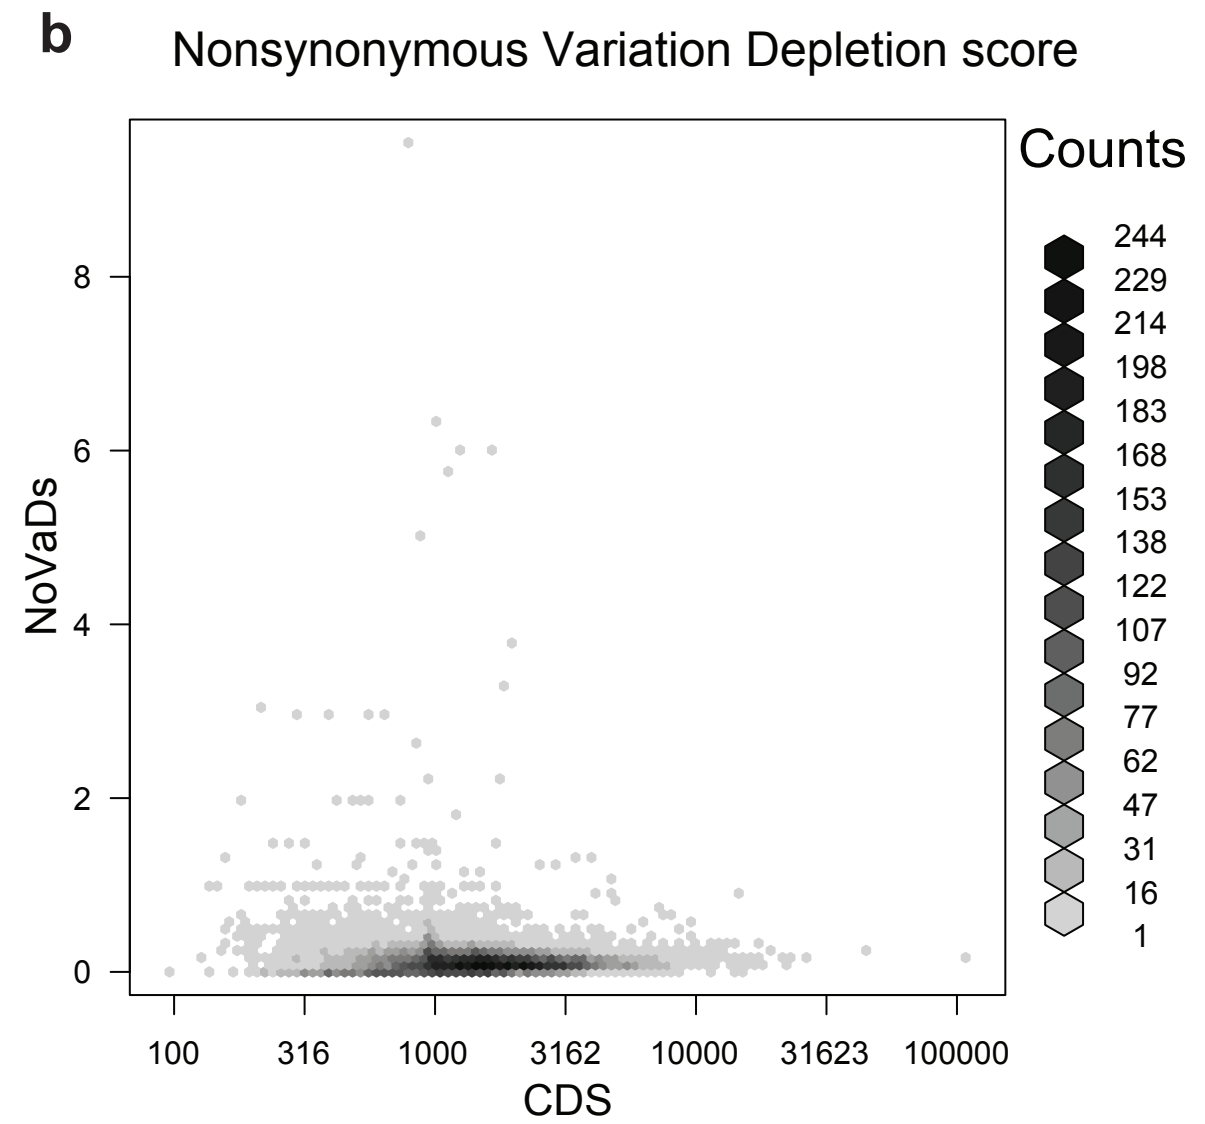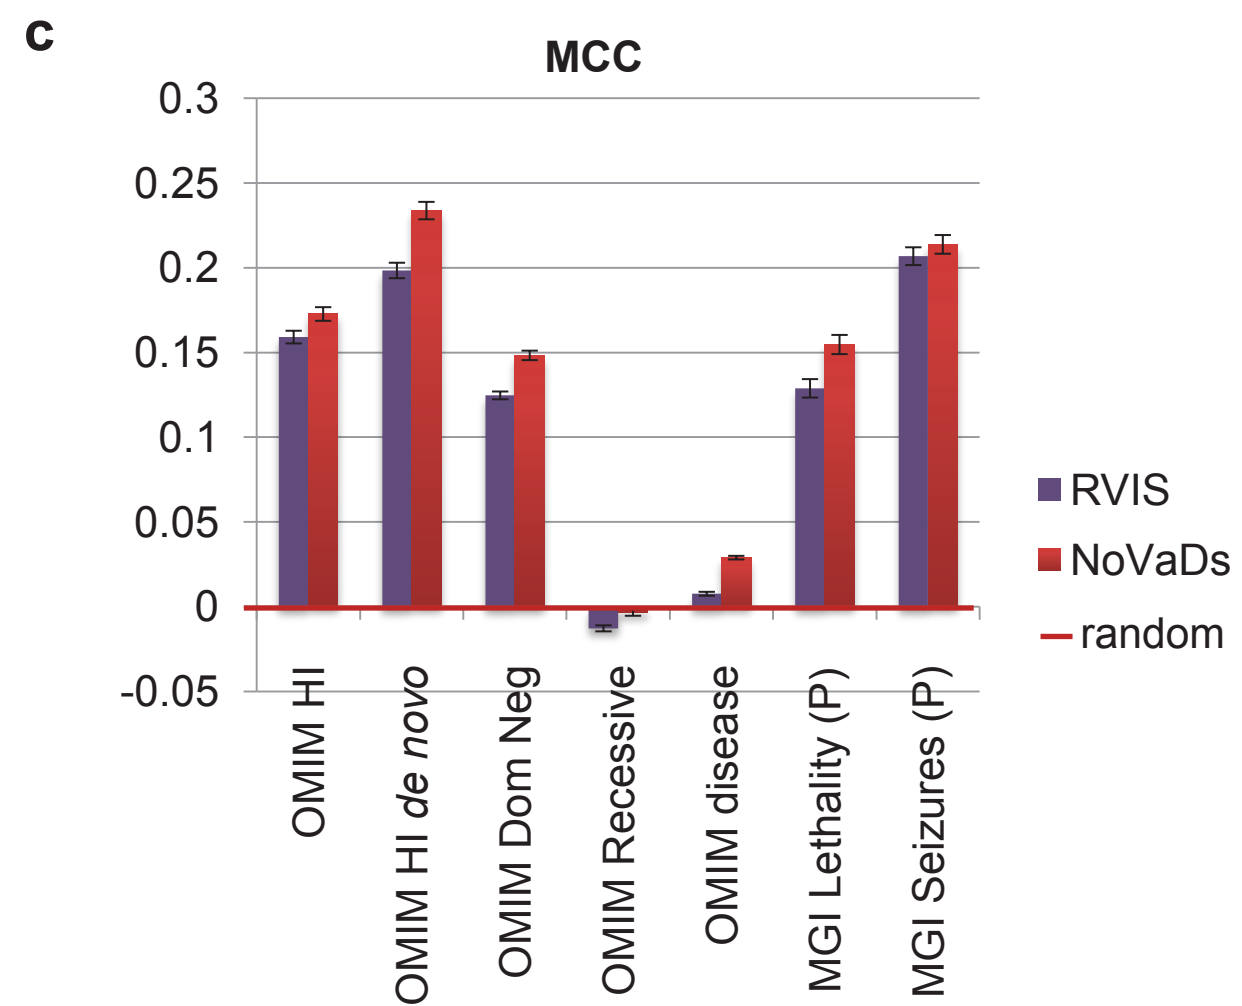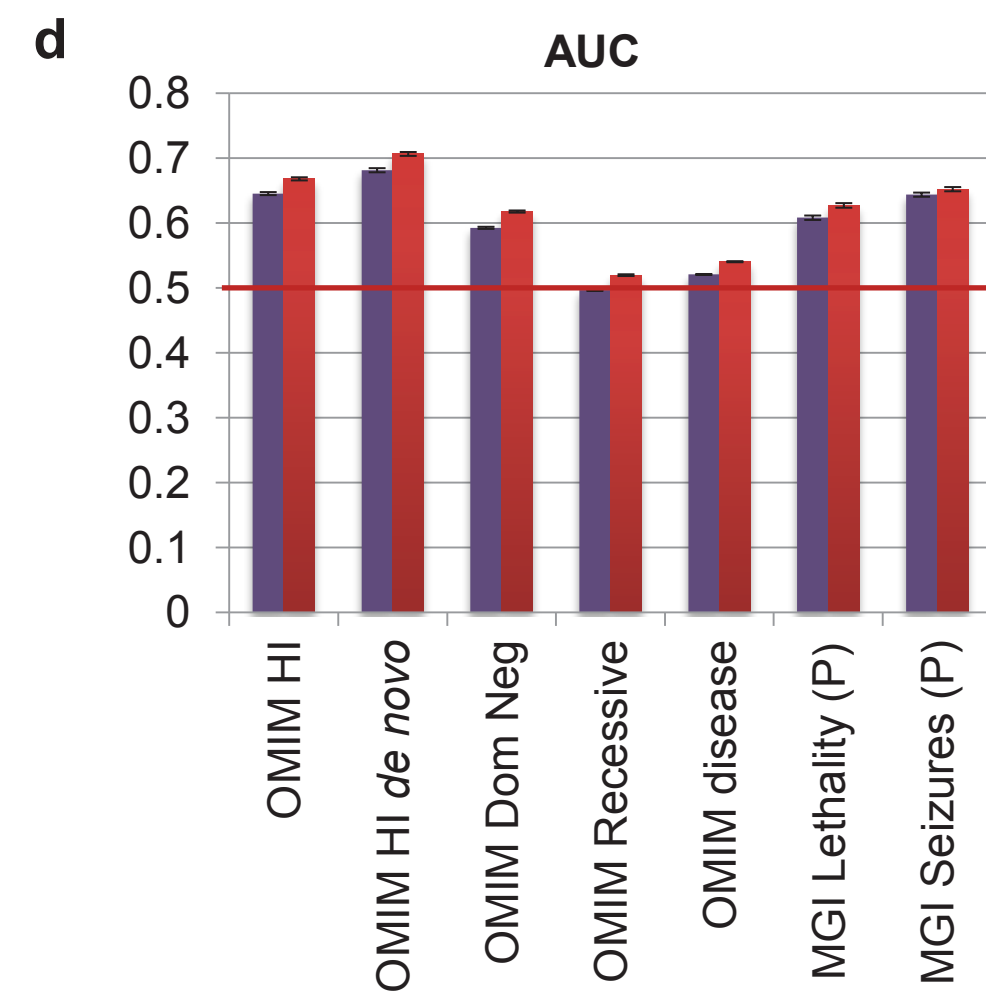

Figure S3

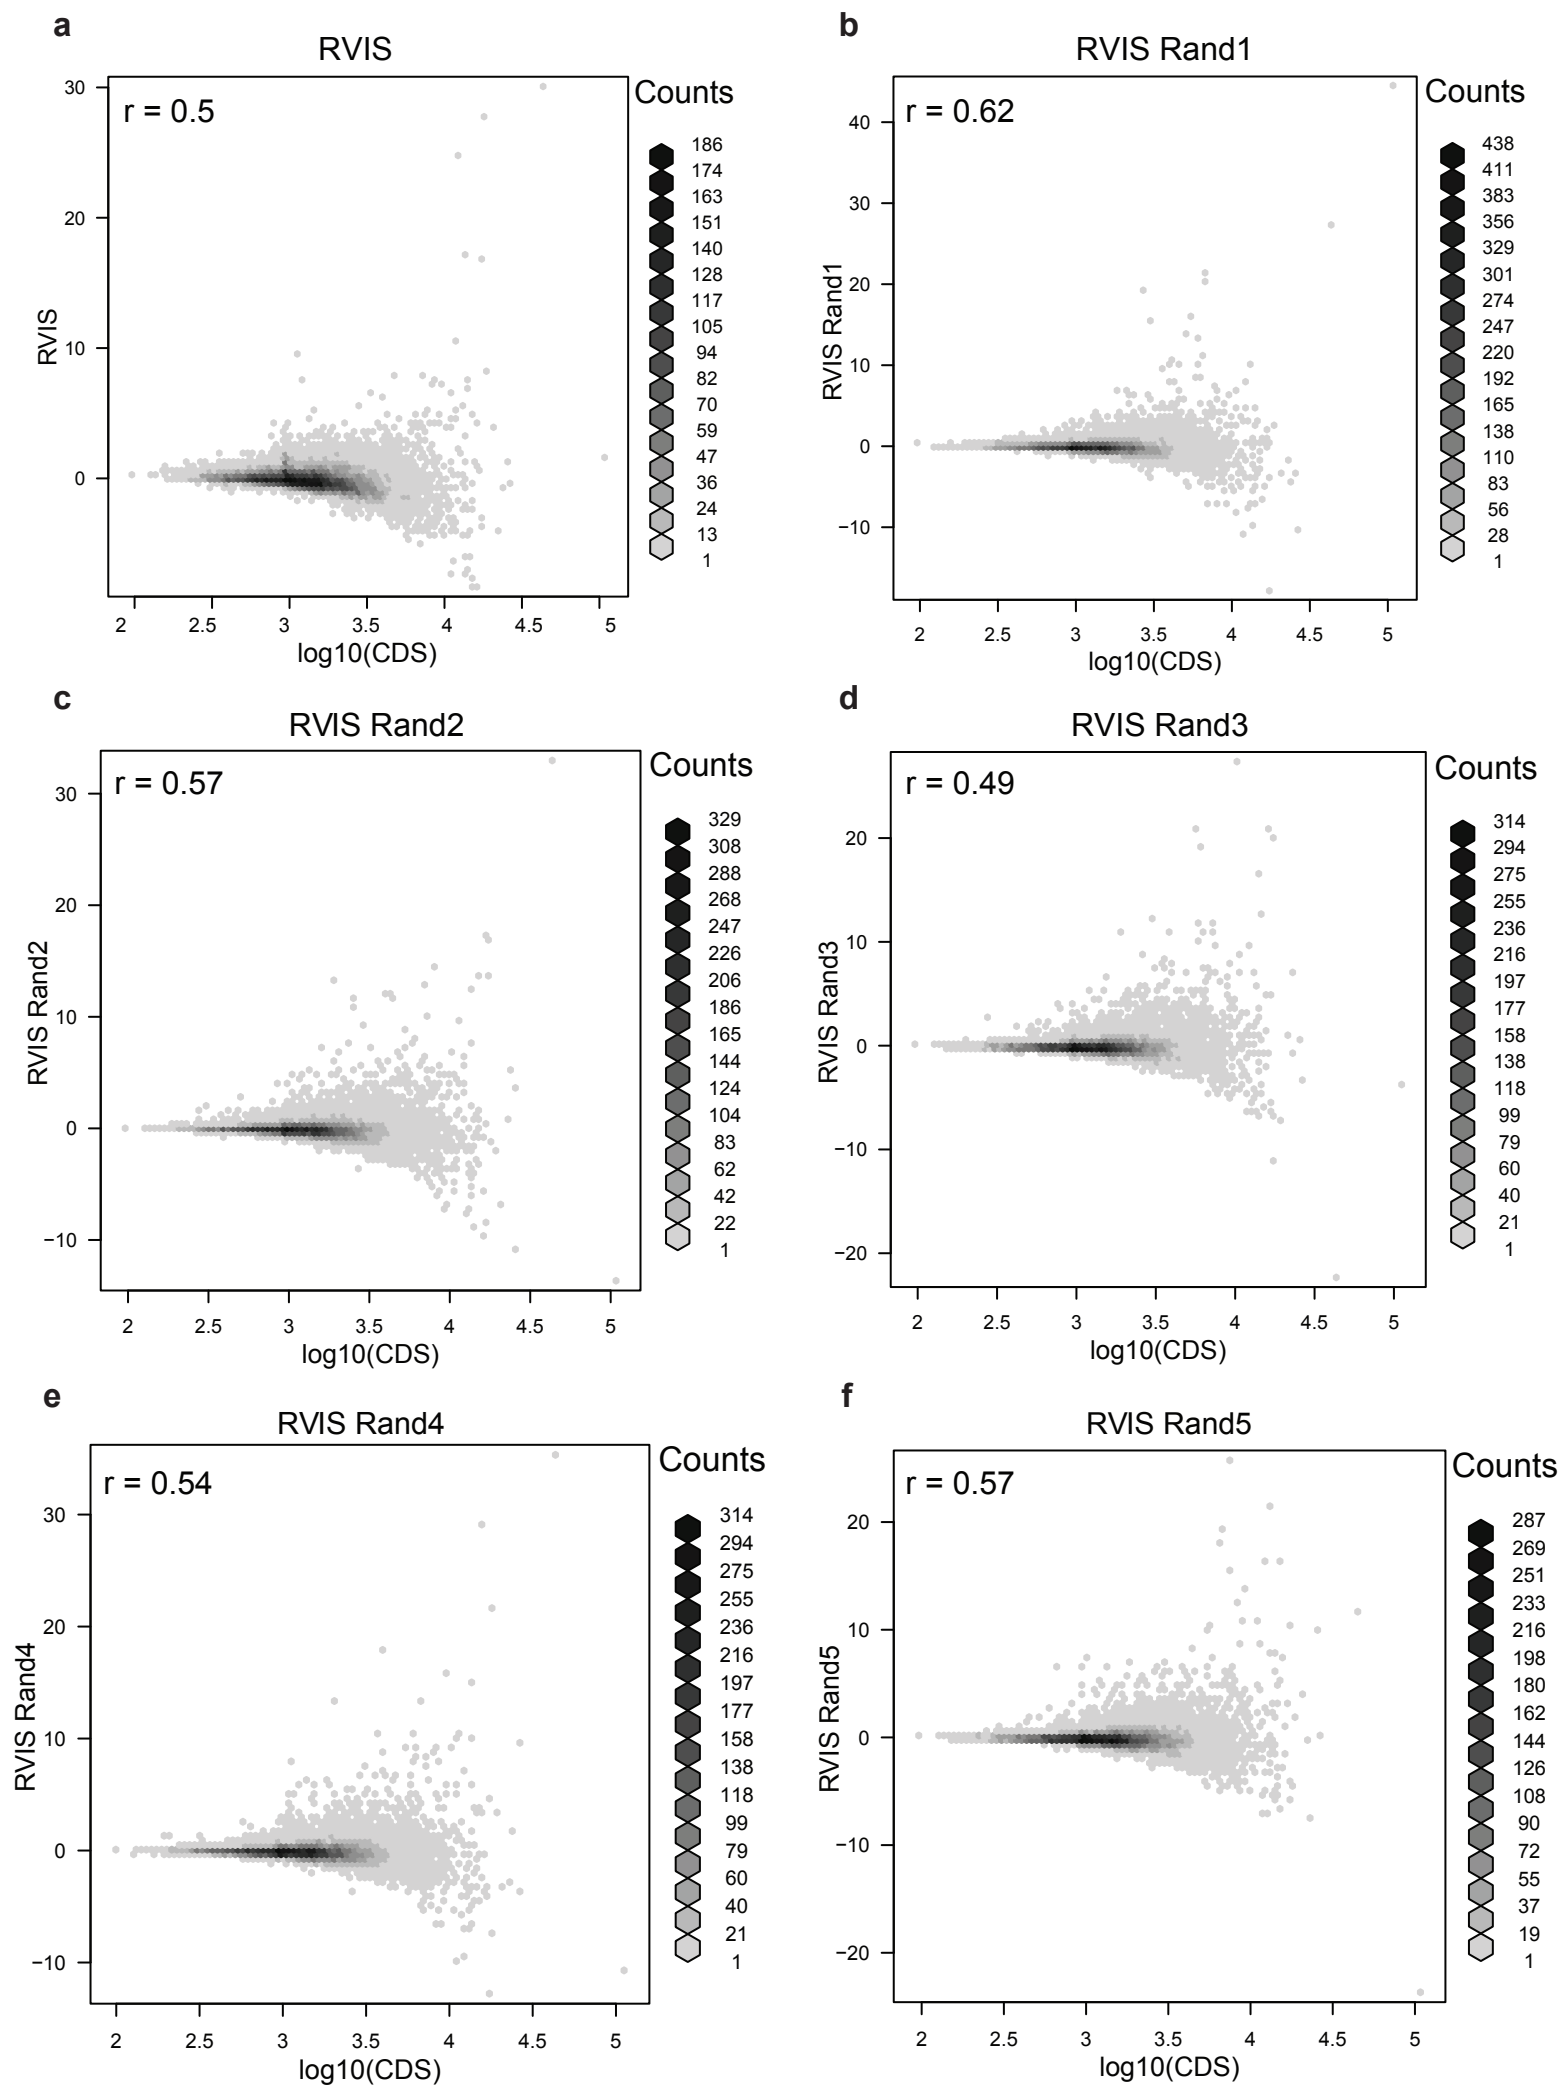

Figure S4

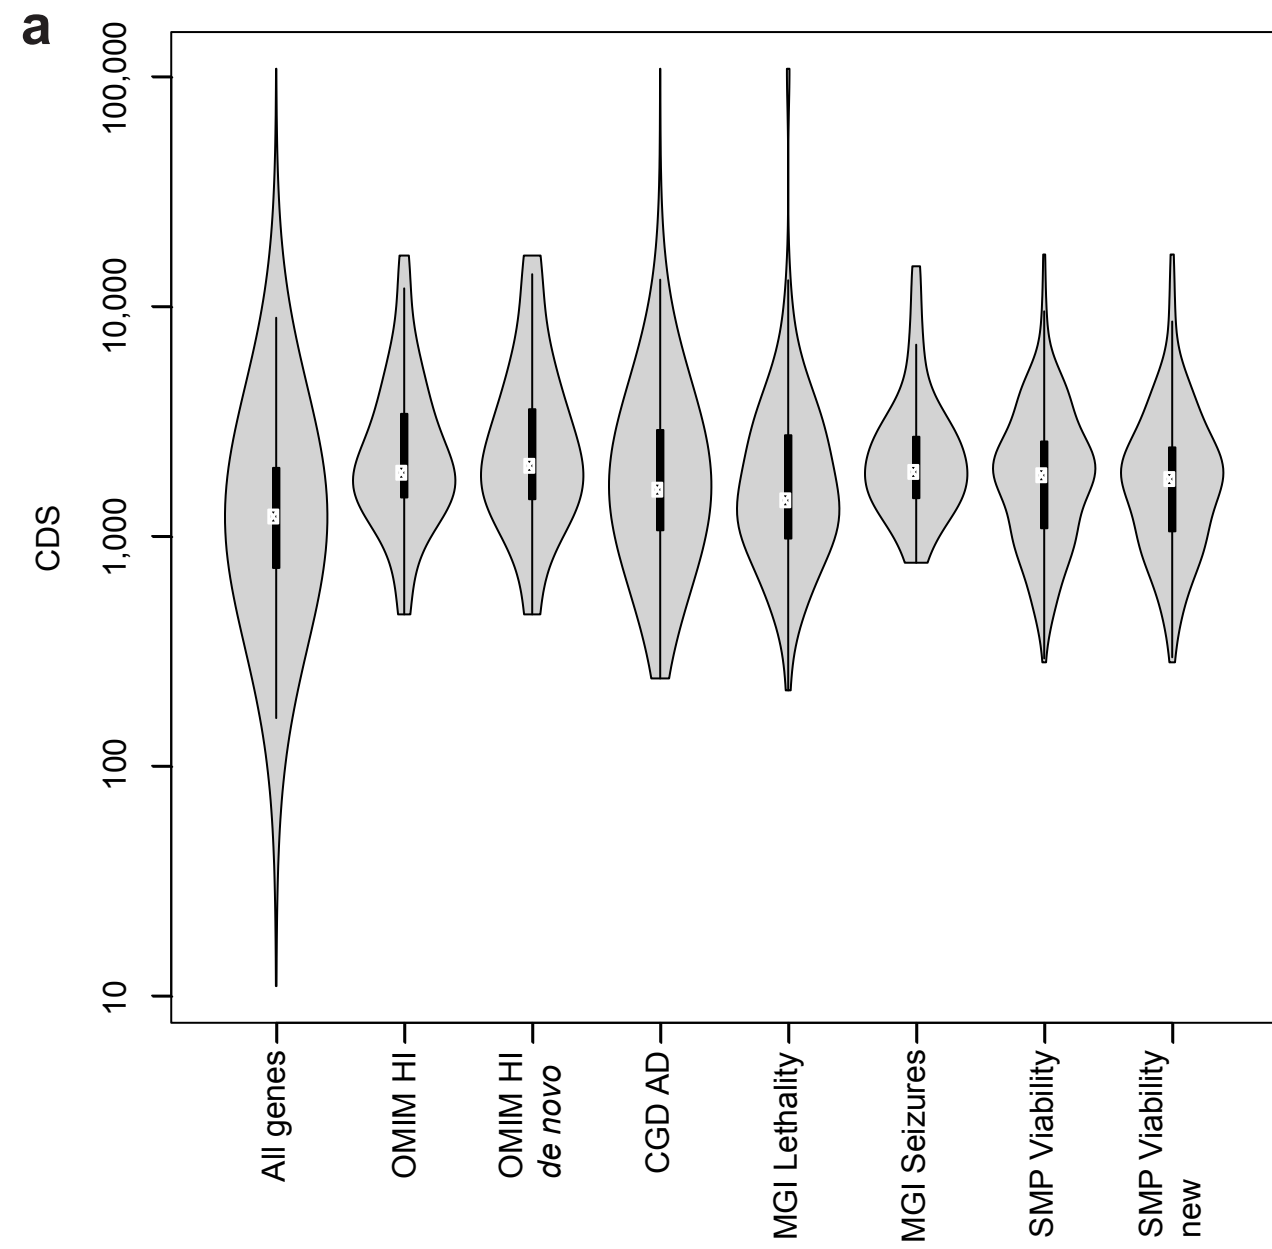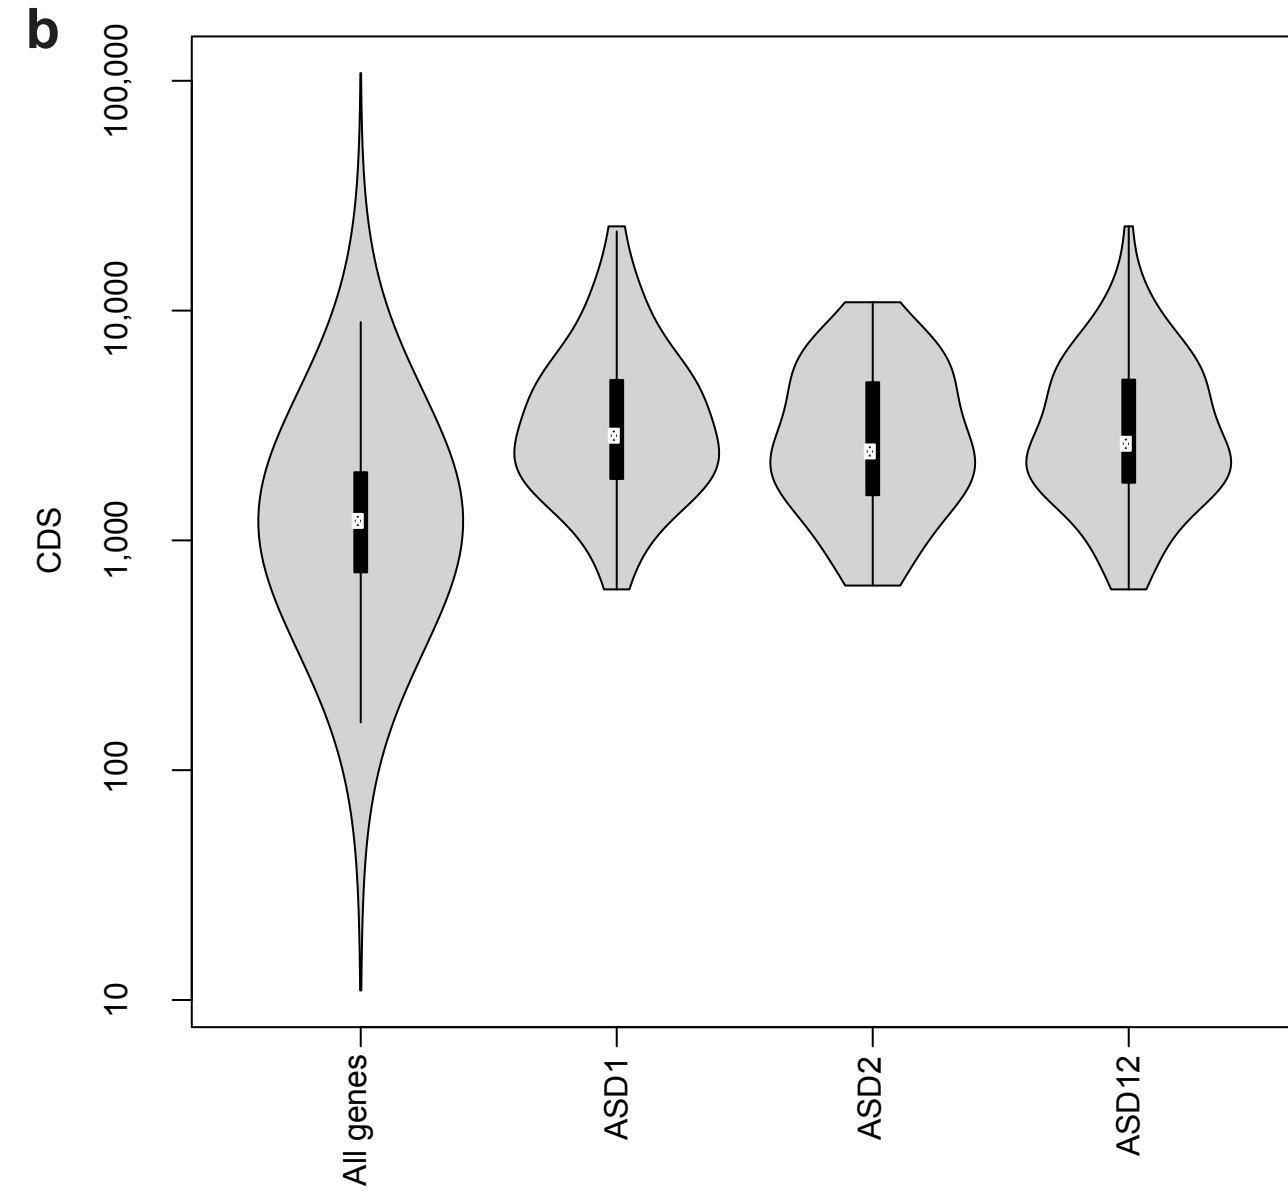

Figure S5

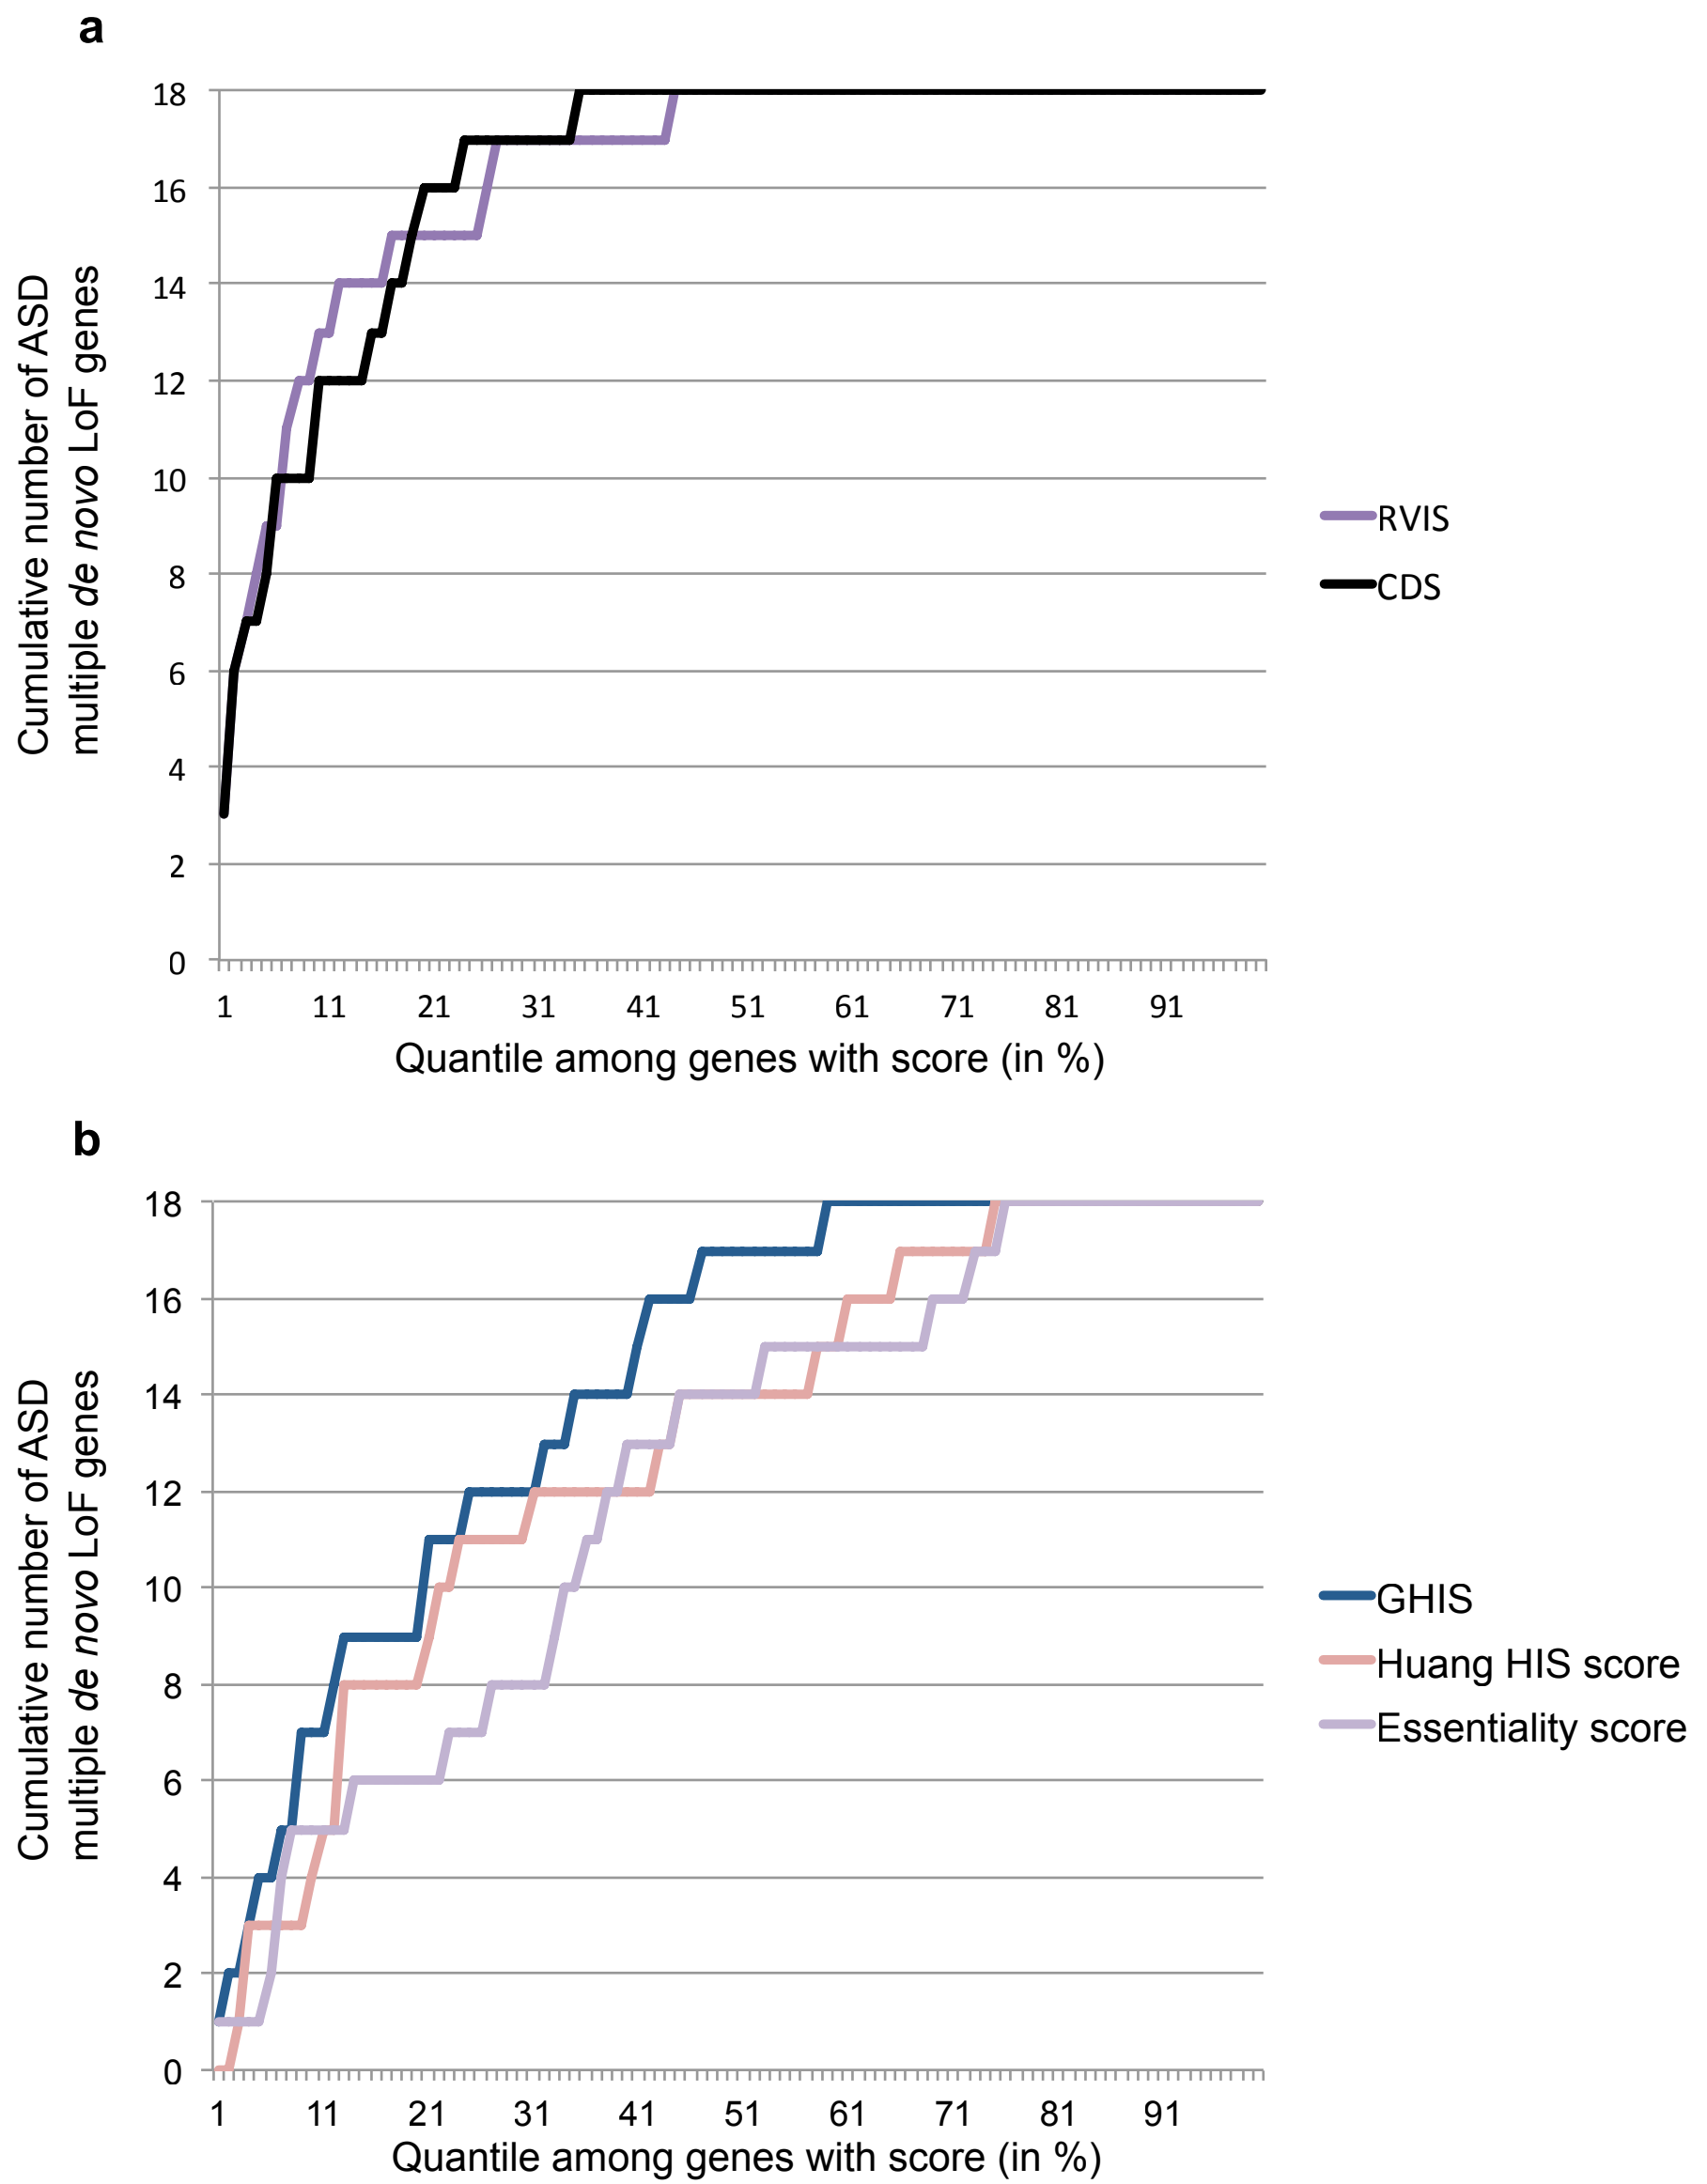

Figure S6

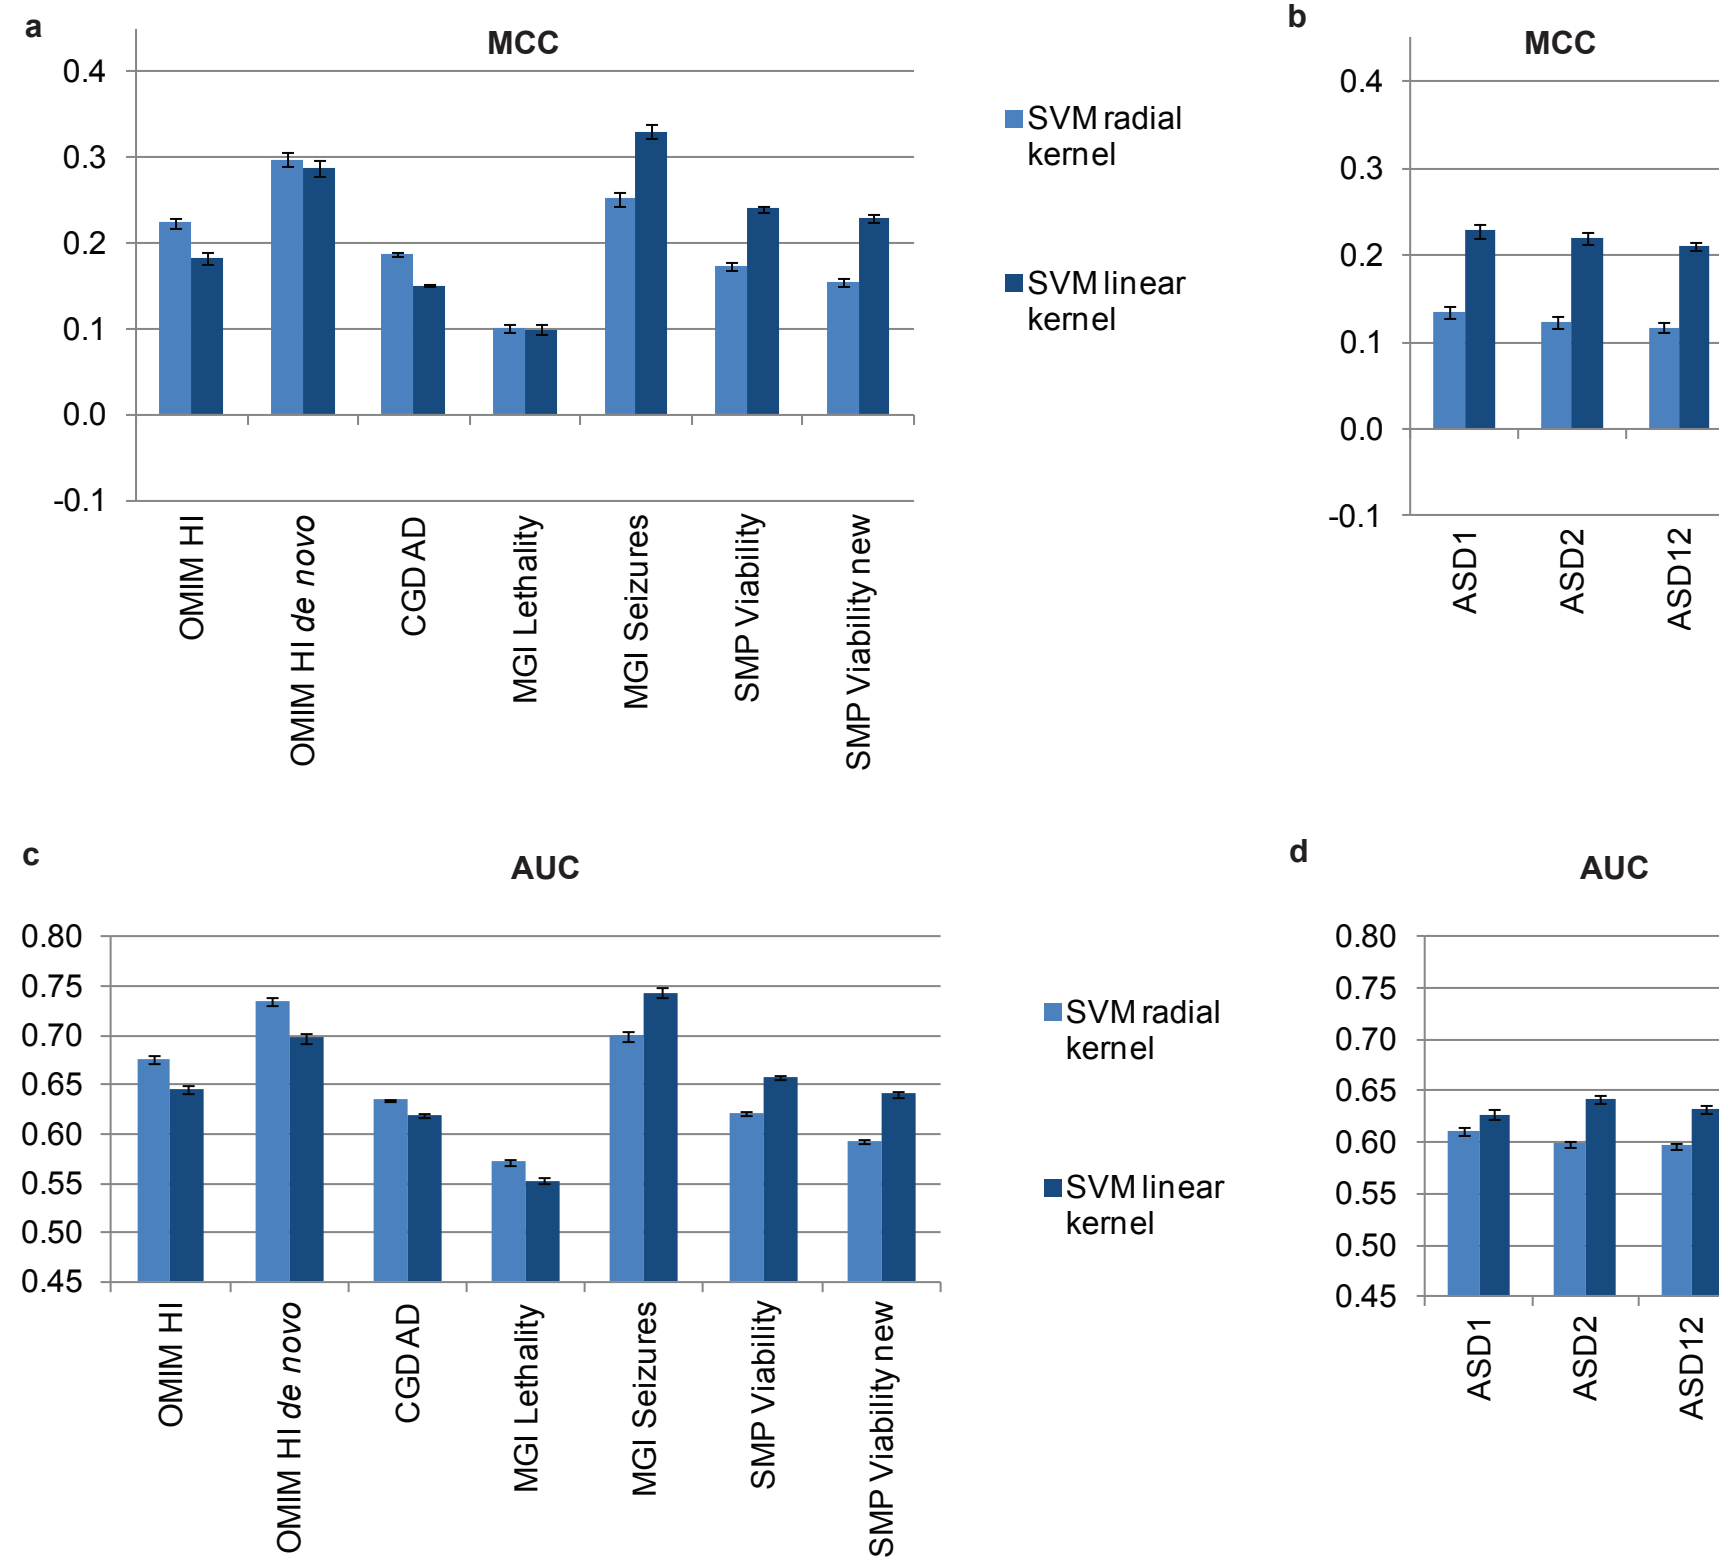

Figure S7

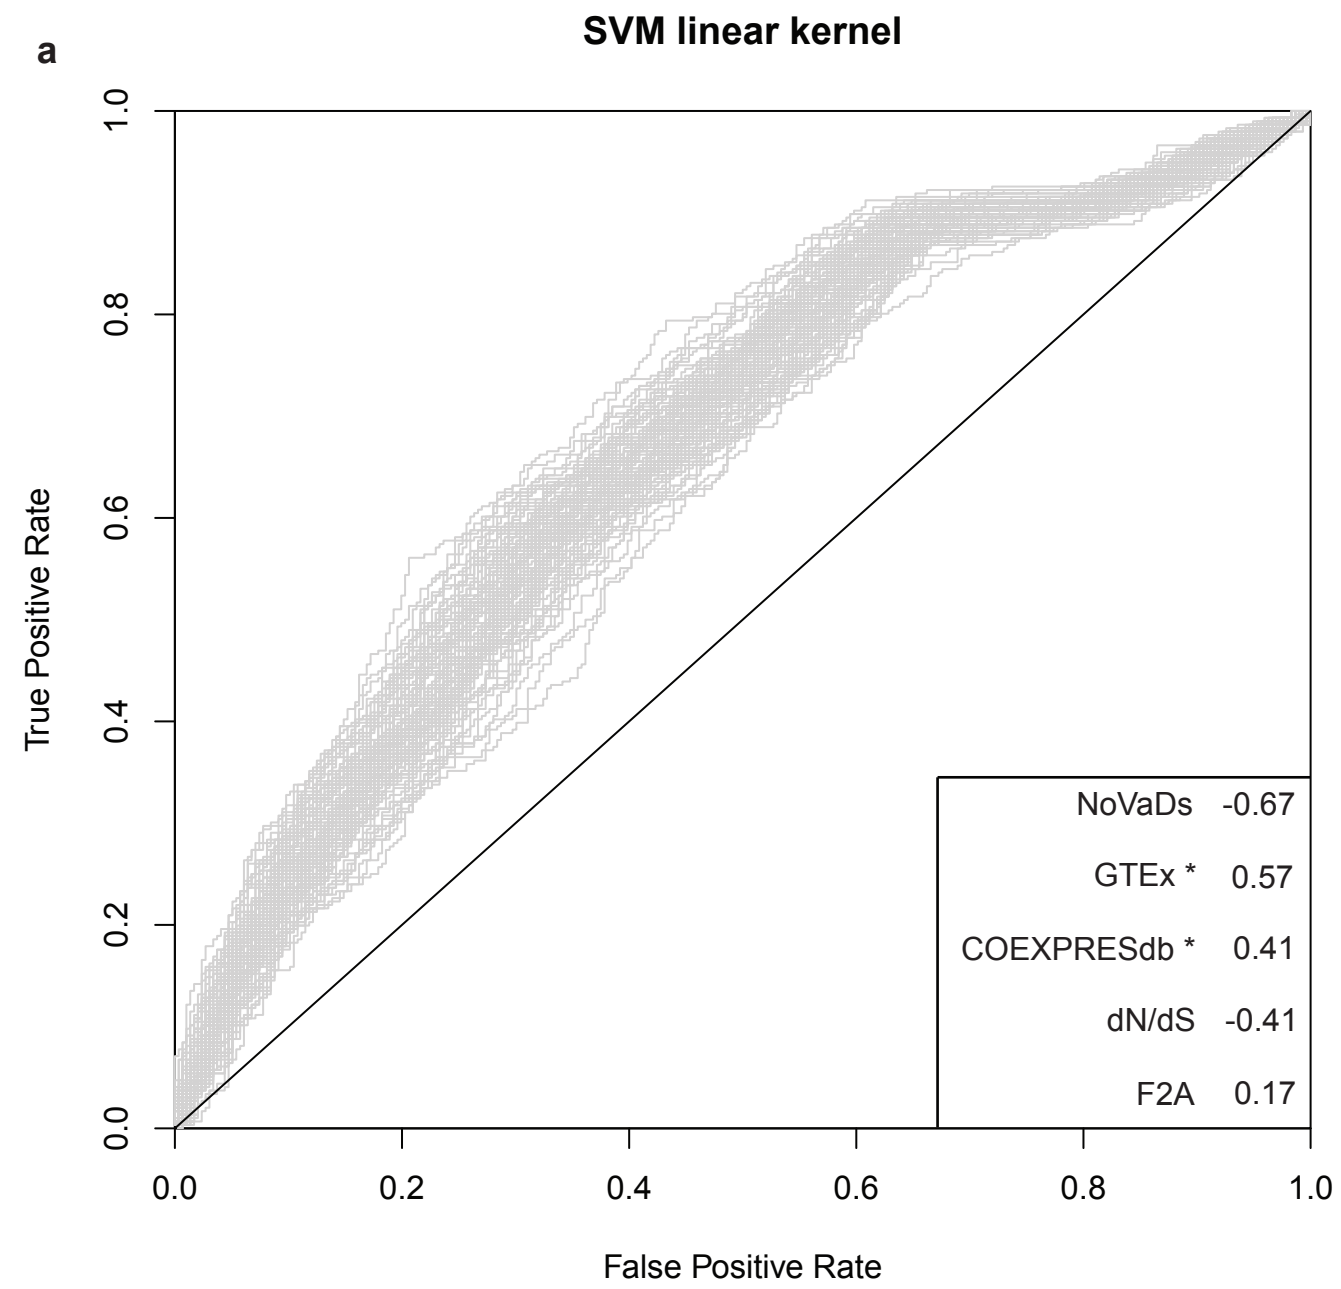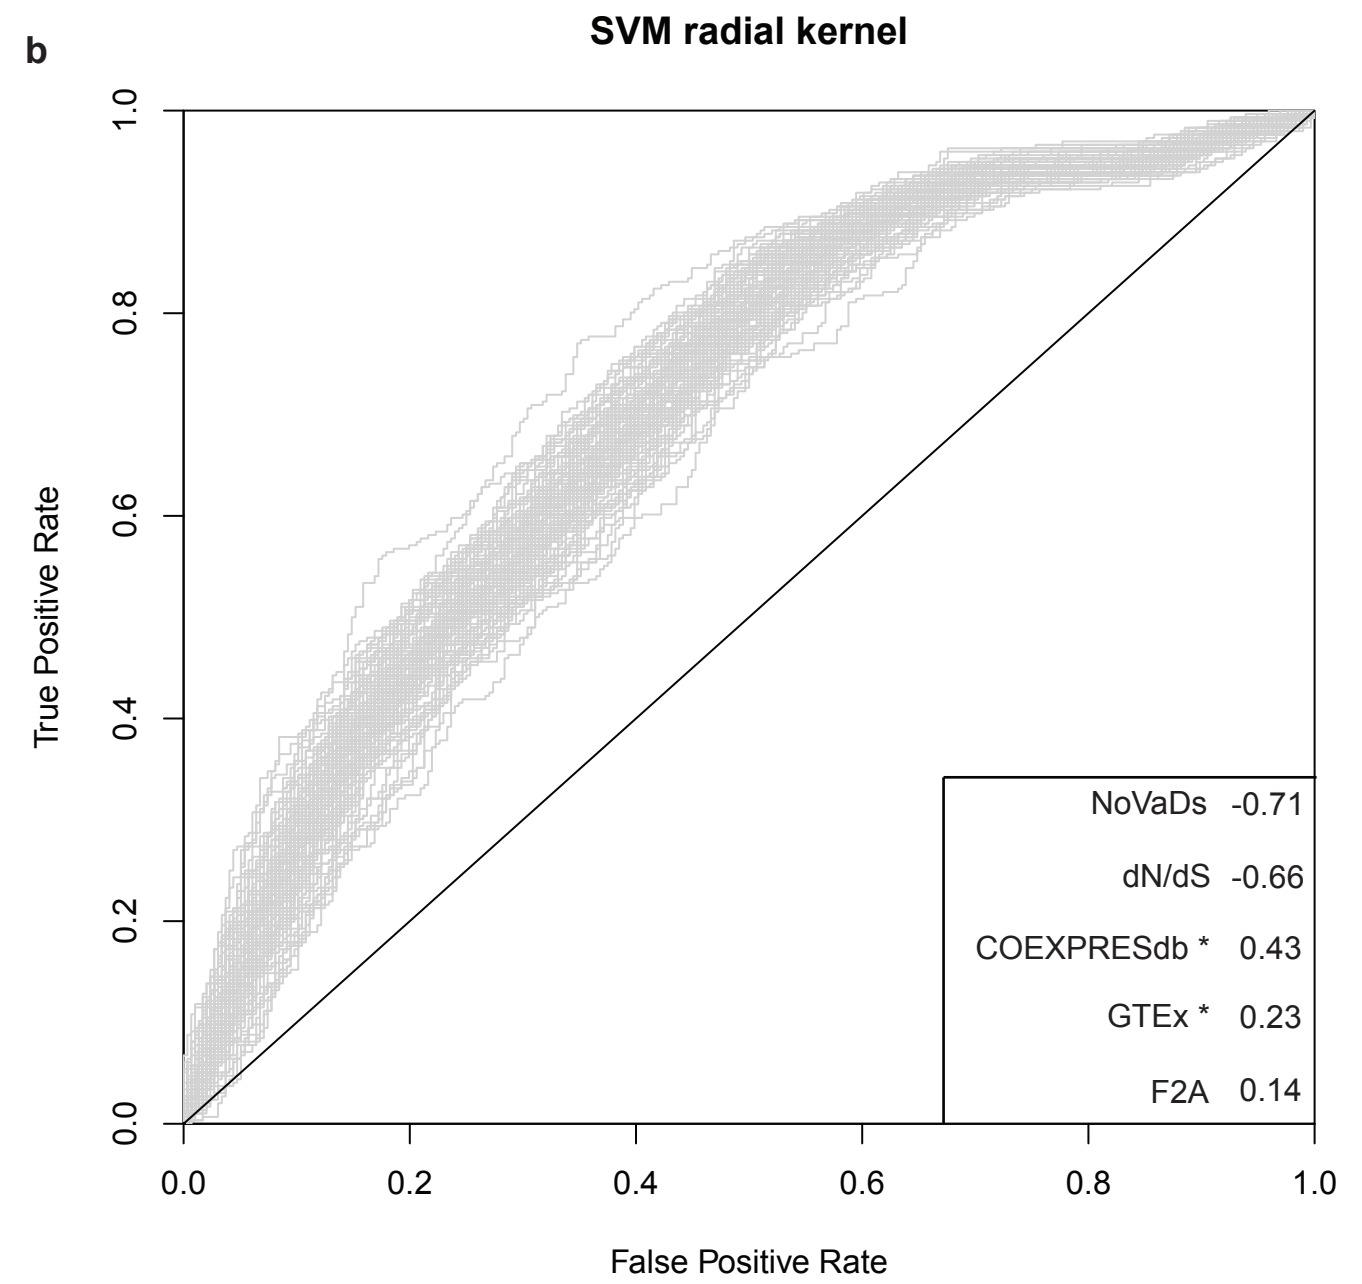

Figure S8
